# Supplementary material for: Imine bond-directed assembly of polyoxometalate-based metal–organic frameworks
Source: Royal Society of Chemistry journal article supplement (doi:10.1039/d4dt02609h), 2024-01-01
Supplement: d4dt02609h1.pdf [file d4dt02609h1.pdf]

## Supplementary Information

### **Imine Bond-Directed Assembly of Polyoxometalate-Based Metal–Organic Frameworks**

Xiang Yu<sup>†</sup>, Xinyu Xu<sup>†</sup>, Lei Gao, Rengan Luo, Yi-Fan Liu, Yu-Hao Gu, Shuai Yuan\*

State Key Laboratory of Coordination Chemistry, School of Chemistry and Chemical Engineering, Nanjing University, Nanjing 210023, China

<sup>†</sup>These authors contributed equally to this work.

## Materials and methods

All reagents were of reagent-grade, obtained from commercial sources, and used without further purification. Single-crystal X-ray diffraction intensity data for Zn-POMOF, Co-POMOF, and Fe(III)-POMOF were collected on a Bruker D8 Venture diffractometer.  $^1\text{H}$  NMR data were recorded on a Bruker Avance III 400 NMR spectrometer. FT-IR spectra were recorded on a Vector 27 Bruker Spectrophotometer by transmission through KBr pellets containing ground crystals in the range 4000-400  $\text{cm}^{-1}$ . TGA data were obtained on a TGA 4000 thermal analysis system at a heating rate of 5  $^{\circ}\text{C min}^{-1}$  under an air atmosphere. Powder X-ray diffraction (PXRD) patterns were collected at room temperature at a scan speed of 0.1 s/step on a Bruker Advance D8 (40 kV, 40 mA) diffractometer equipped with Cu radiation. Simulated PXRD patterns were generated from single-crystal data using Mercury 3.0. The morphology and elemental mapping of the samples were characterized by transmission electron microscopy (TEM, JEOL JEM-2800). Metal content was analyzed via inductively coupled plasma optical emission spectroscopy (ICP-OES) using the Jarrell-Ash 1100 + 2000 instrument. The morphology and elemental mapping of samples were characterized by field emission scanning electron microscopy (SEM, Hitachi Regulus SU8230). X-ray photoelectron spectroscopy (XPS) measurements were carried out at a Thermo Fisher Scientific EscaLab 250 Xi (Al  $K\alpha$  radiation,  $h\nu = 1486.6$  eV) equipped with an electron flood gun. XPS data were analyzed using Thermo Fisher Scientific Advantage Data System software and all spectra were referenced to the C 1s peak (284.8 eV). Single-crystal X-ray diffraction intensity data for POM-COOH, Zn-POMOF, Co-POMOF, and Fe(III)-POMOF were collected on a Bruker D8 Venture diffractometer fitted with a PHOTON-100 CMOS detector, monochromatized microfocus Mo  $K\alpha$  radiation ( $\lambda = 0.71073$  Å), and a nitrogen flow controlled by a KRYOFLEX II low-temperature attachment operating at 193 K. Raw data collection and reduction was controlled using APEX3 software. The structures were solved by direct methods and refined by full-matrix squares least-squares on F2 using the SHELXTL software package.

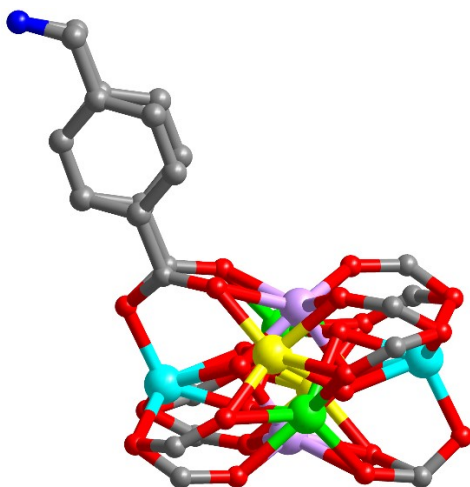

**Fig. S1** The single-crystal structure of the  $Zn_4(Zn_4(OH)_2(COO)_6(H_2O)_6)$  clusters in Zn-POMOF with three-fold disorders. Zn-POMOF and Co-POMOF are isostructural, consisting of  $Zn_4(OH)_2(COO)_6(H_2O)_6$  and  $Co_4(OH)_2(COO)_6(H_2O)_6$  clusters, which exhibit identical coordination environments. However, the  $Zn_4$  clusters exhibit disorder, while the  $Co_4$  clusters are ordered in the refined crystal structure.

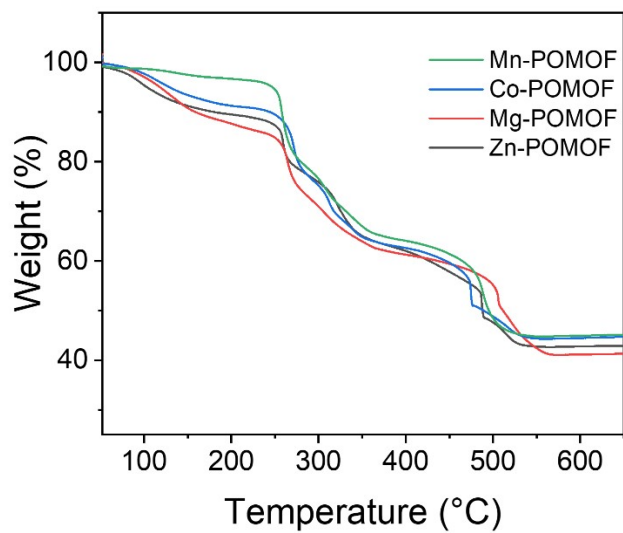

**Fig. S2.** Thermogravimetric analysis (TGA) of M(II)-POMOFs (M = Zn, Co, Mn, Mg).

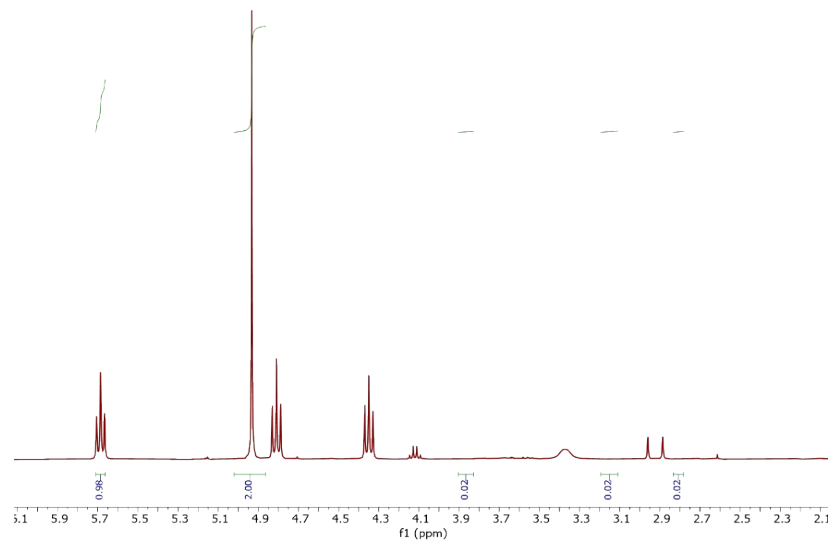

**Fig. S3** The yields of the cyclic carbonates were calculated by  $^1\text{H}$  NMR of the Fe(III)-POMOF using  $\text{CH}_2\text{Br}_2$  as an internal standard.<sup>1, 2</sup>

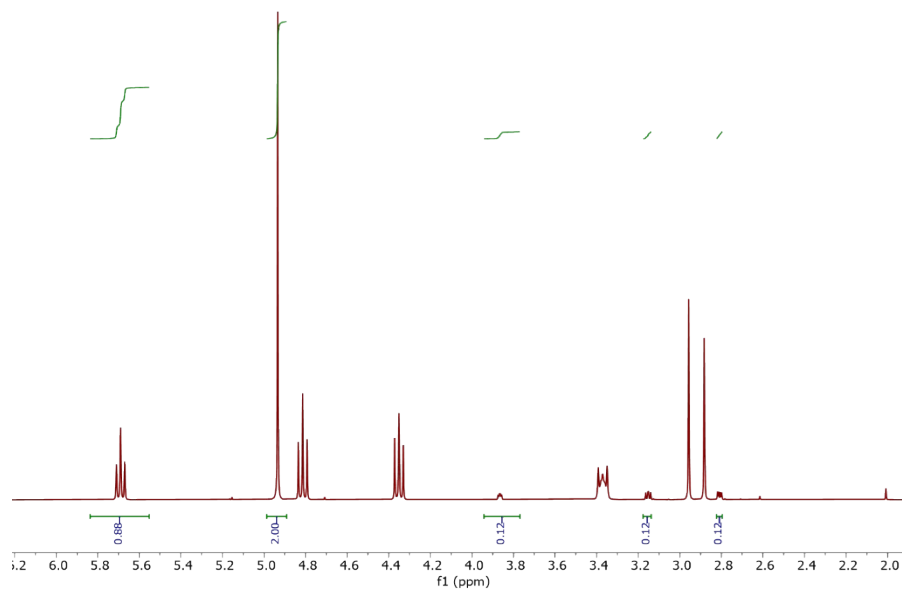

**Fig. S4** The yields of the cyclic carbonates were calculated by  $^1\text{H}$  NMR of Zn-POMOF using  $\text{CH}_2\text{Br}_2$  as an internal standard.

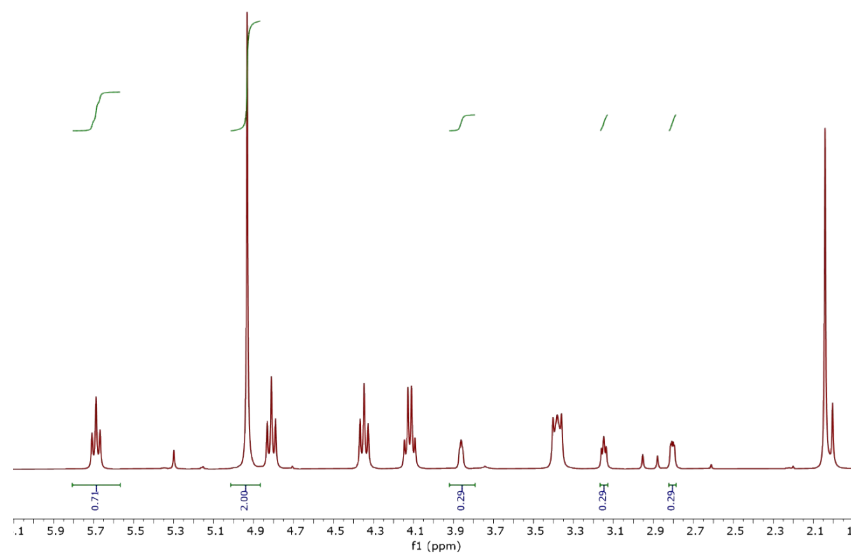

**Fig. S5** The yields of the cyclic carbonates were calculated by <sup>1</sup>H NMR of Co-POMOF using CH<sub>2</sub>Br<sub>2</sub> as an internal standard.

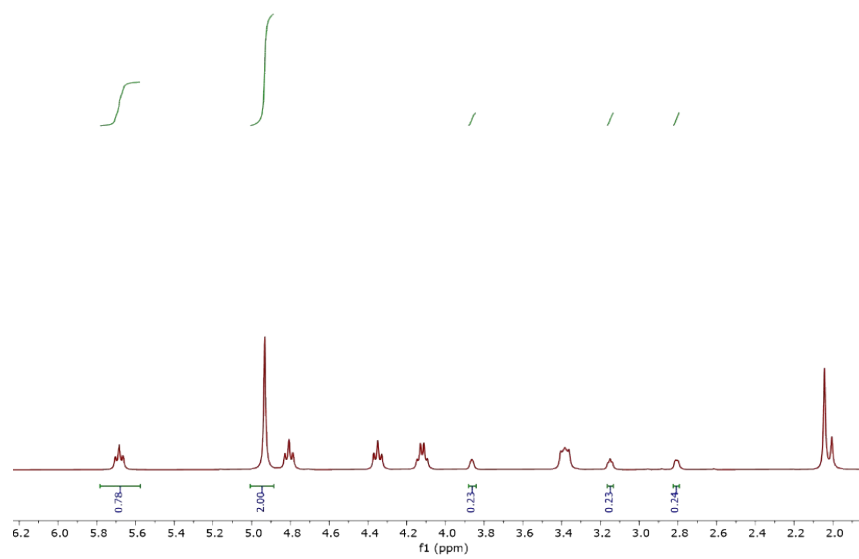

**Fig. S6** The yields of the cyclic carbonates were calculated by <sup>1</sup>H NMR of the Mn-POMOF using CH<sub>2</sub>Br<sub>2</sub> as an internal standard.

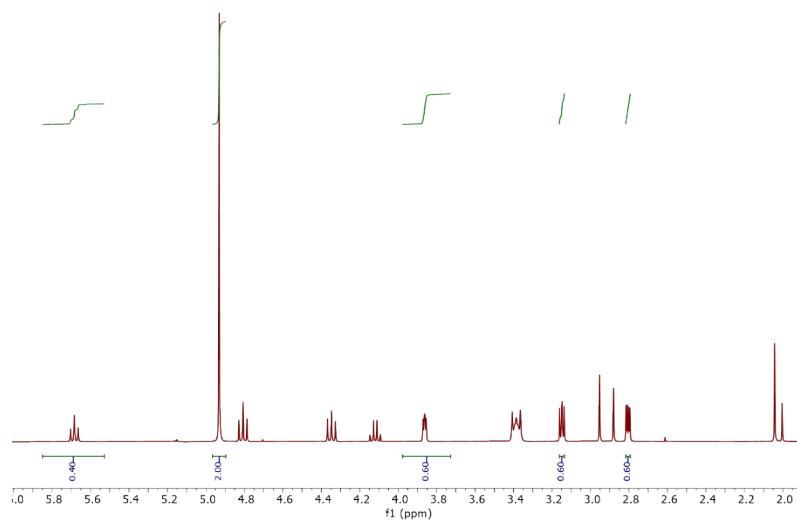

**Fig. S7** The yields of the cyclic carbonates were calculated by  $^1\text{H}$  NMR of the Mg-POMOF using  $\text{CH}_2\text{Br}_2$  as an internal standard.

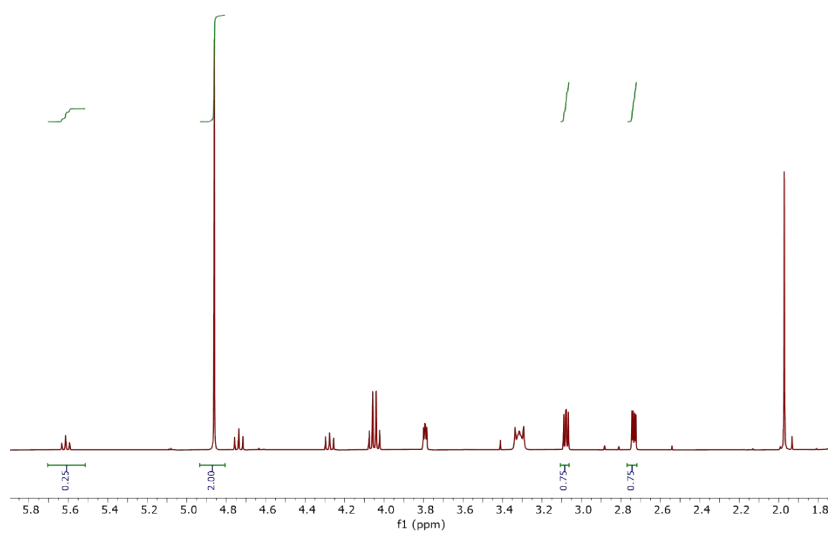

**Fig. S8** The yields of the cyclic carbonates were calculated by  $^1\text{H}$  NMR of a mixture of  $\text{FeCl}_3$  and POM-COOH using  $\text{CH}_2\text{Br}_2$  as an internal standard.

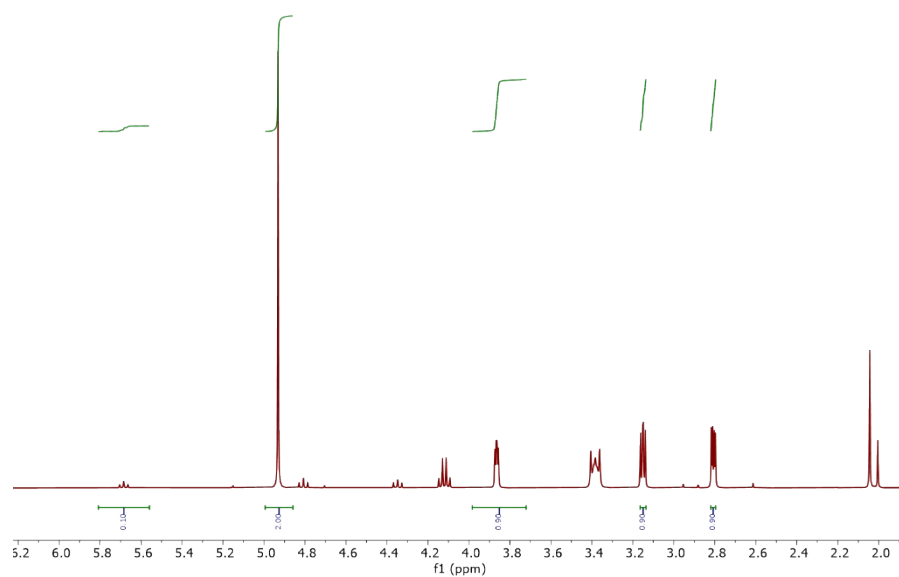

**Fig. S9** The yields of the cyclic carbonates were calculated by  $^1\text{H}$  NMR of POM-COOH using  $\text{CH}_2\text{Br}_2$  as an internal standard.

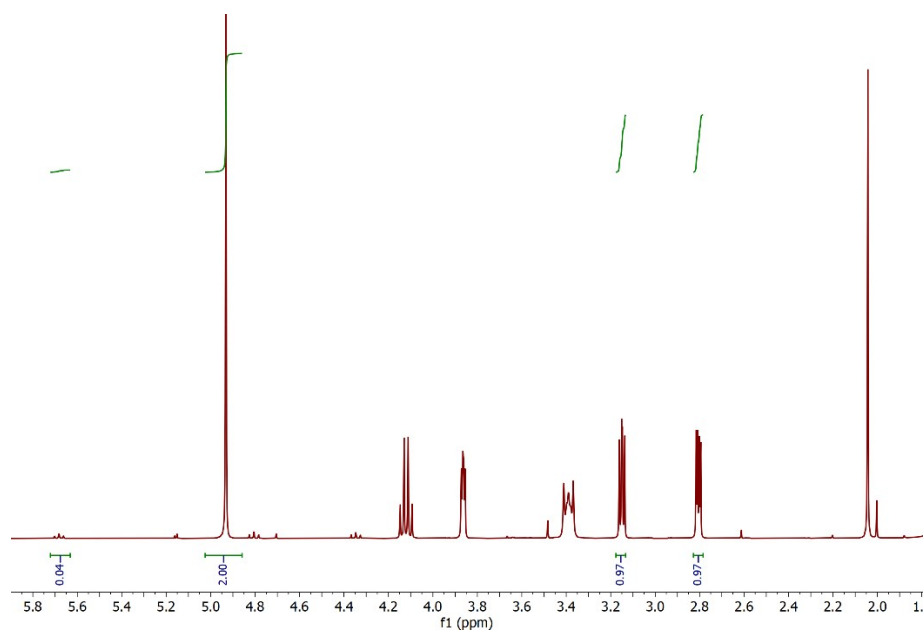

**Fig. S10** The yields of the cyclic carbonates were calculated by  $^1\text{H}$  NMR of  $\text{FeCl}_3$  using  $\text{CH}_2\text{Br}_2$  as an internal standard.

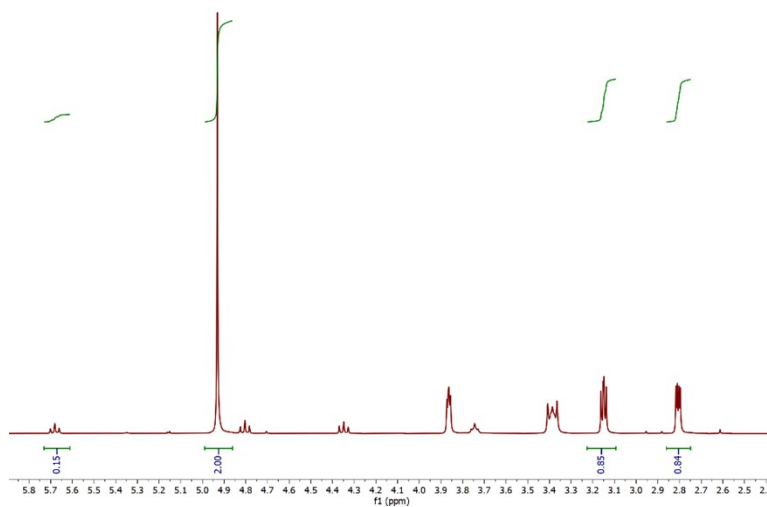

**Fig. S11** The yields of the cyclic carbonates were calculated by <sup>1</sup>H NMR of PCN-250 using CH<sub>2</sub>Br<sub>2</sub> as an internal standard.

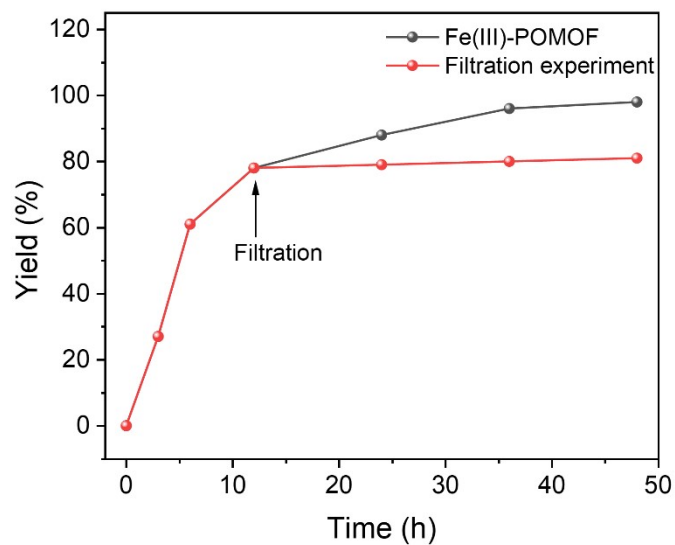

**Fig. S12** Hot filtration of the reaction system was performed after 12 h catalytic reaction, then leaving the filtrate for subsequent reaction for 36 h.



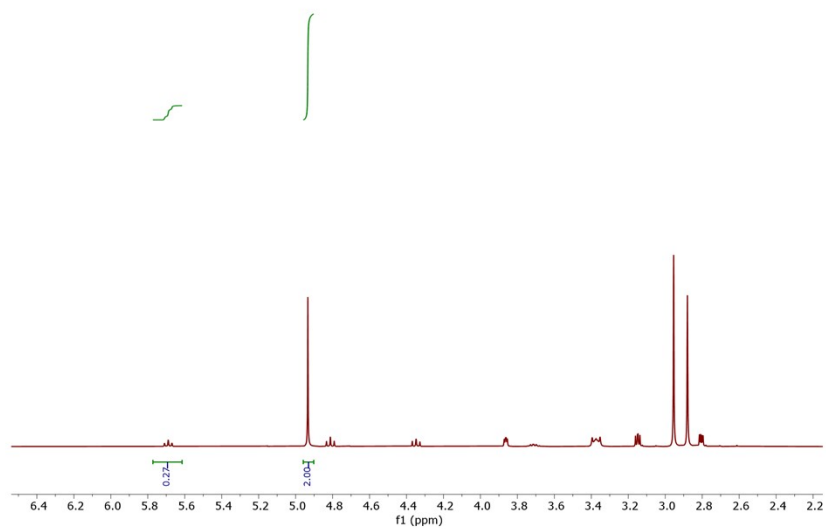

**Fig. S13** The yields of the cyclic carbonates for reaction 3 h were calculated by <sup>1</sup>H NMR of Fe(III)-POMOF using CH<sub>2</sub>Br<sub>2</sub> as an internal standard.

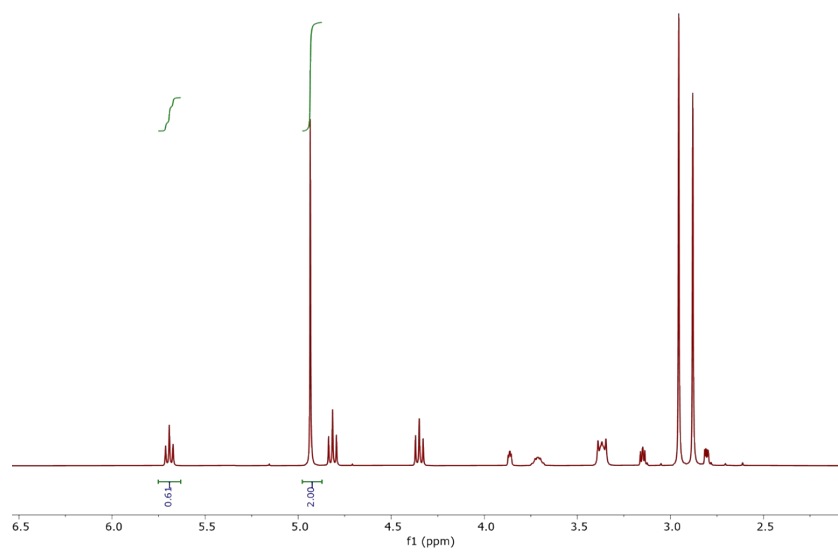

**Fig. S14** The yields of the cyclic carbonates for reaction 6 h were calculated by <sup>1</sup>H NMR of Fe(III)-POMOF using CH<sub>2</sub>Br<sub>2</sub> as an internal standard.

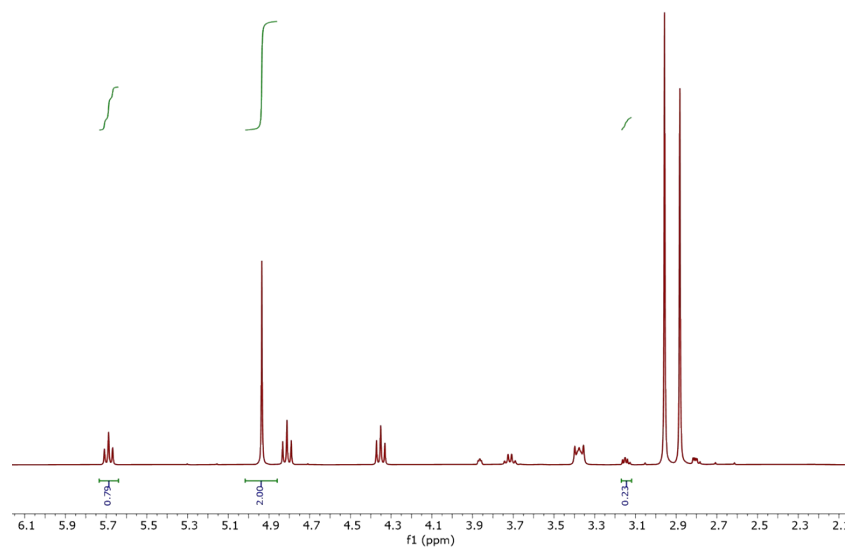

**Fig. S15** The yields of the cyclic carbonates for reaction 12 h were calculated by  $^1\text{H}$  NMR of Fe(III)-POMOF using  $\text{CH}_2\text{Br}_2$  as an internal standard.

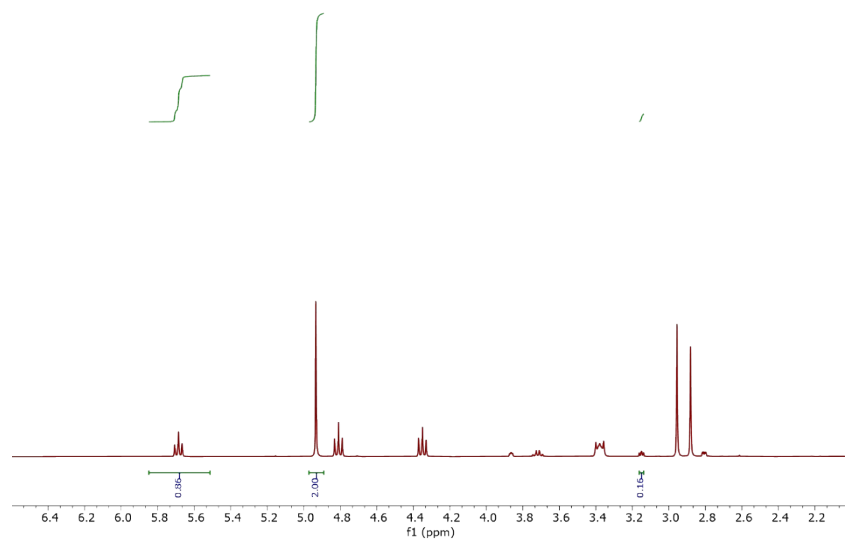

**Fig. S16** The yields of the cyclic carbonates for reaction 24 h were calculated by  $^1\text{H}$  NMR of Fe(III)-POMOF using  $\text{CH}_2\text{Br}_2$  as an internal standard.

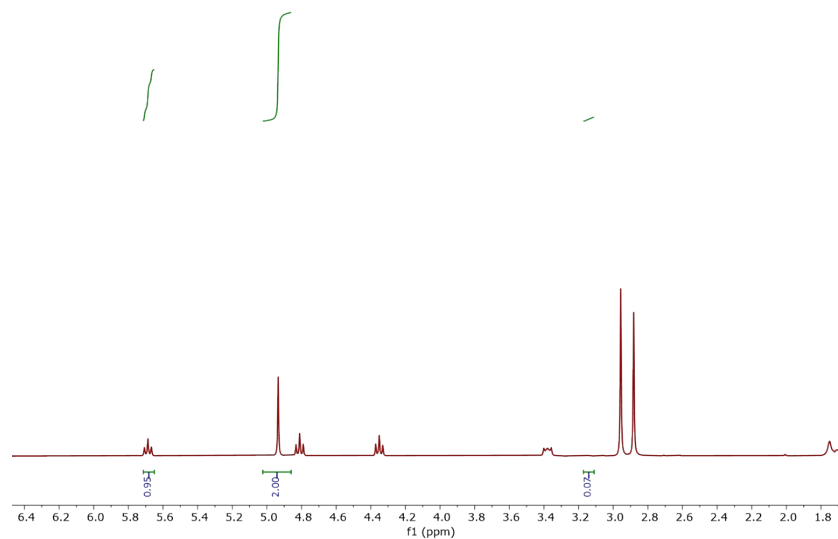

**Fig. S17** The yields of the cyclic carbonates for reaction 36 h were calculated by  $^1\text{H}$  NMR of Fe(III)-POMOF using  $\text{CH}_2\text{Br}_2$  as an internal standard.

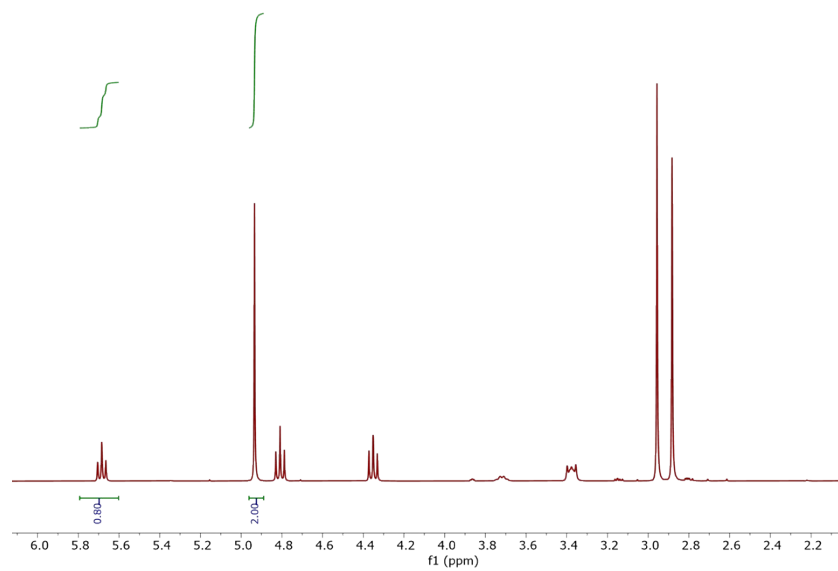

**Fig. S18** The yields of the cyclic carbonates after hot filtration were calculated by  $^1\text{H}$  NMR of Fe(III)-POMOF using  $\text{CH}_2\text{Br}_2$  as an internal standard.

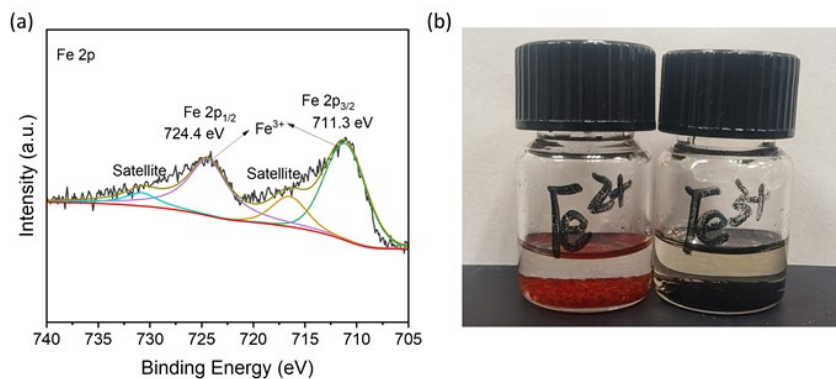

**Fig. S19** XPS Fe 2p spectra of Fe(III)-POMOF (a) and the color change of Fe-POMOF (b).

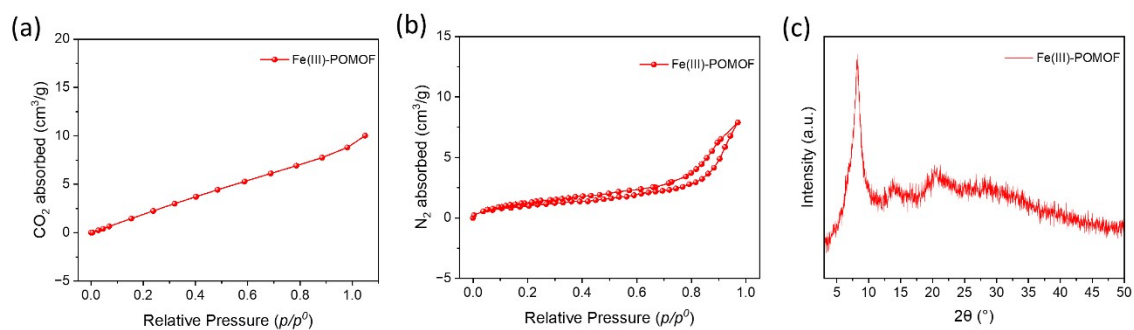

**Fig. S20** (a) CO<sub>2</sub> adsorption isotherm of Fe(III)-POMOF at 298K. (b) N<sub>2</sub> adsorption-desorption isotherms of Fe(III)-POMOF at 77 K. (c) PXRD patterns of Fe(III)-POMOF after gas adsorption measurements.

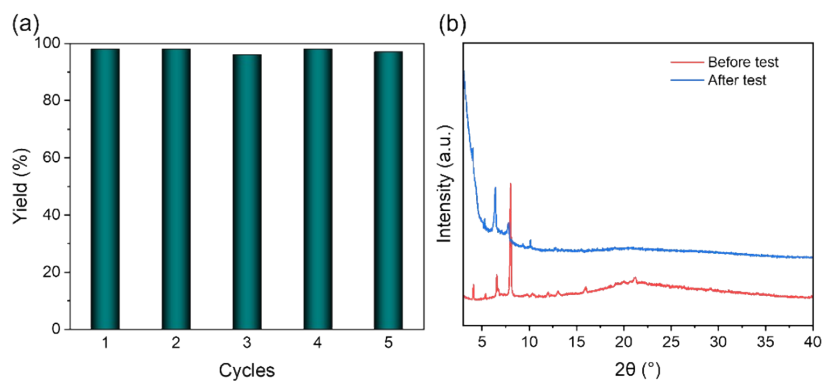

**Fig. S21** (a) Cycling experiments with Fe(III)-POMOF and (b) PXRD before and after catalysis.

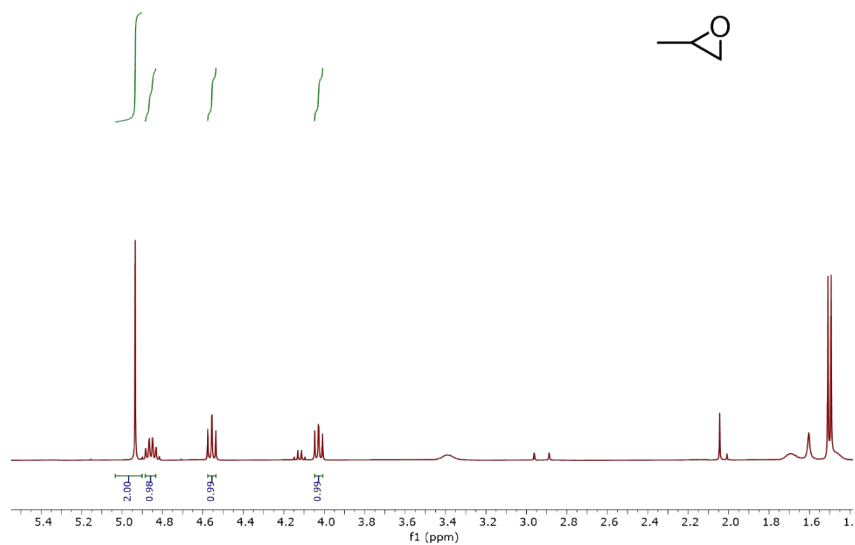

**Fig. S22** The yields of the cyclic carbonates were calculated by  $^1\text{H}$  NMR of propylene oxide using  $\text{CH}_2\text{Br}_2$  as an internal standard.

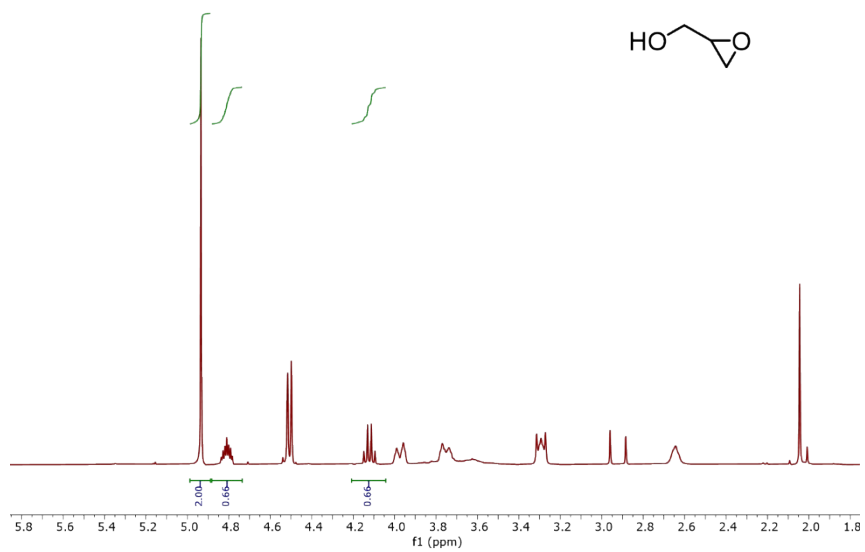

**Fig. S23** The yields of the cyclic carbonates were calculated by  $^1\text{H}$  NMR of epichlorohydrin using  $\text{CH}_2\text{Br}_2$  as an internal standard.

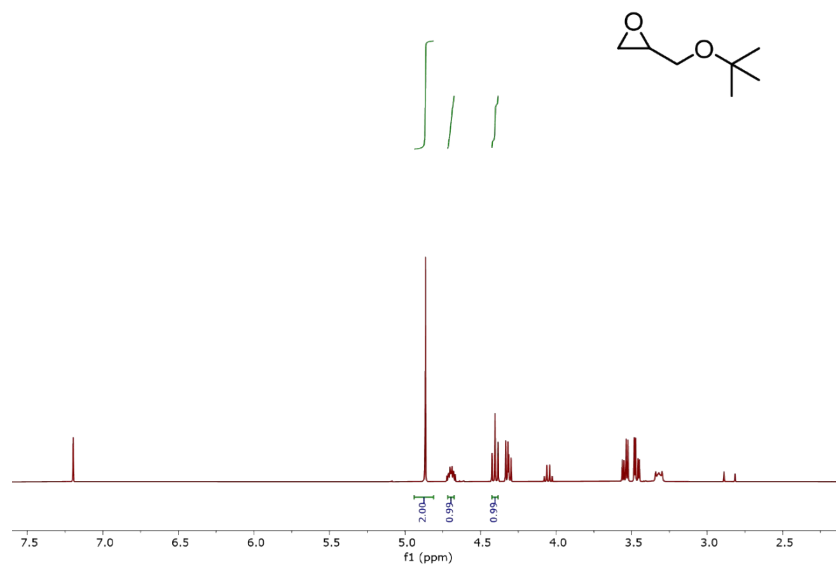

**Fig. S24** The yields of the cyclic carbonates were calculated by <sup>1</sup>H NMR of 2-(tert-butoxymethyl)oxirane using CH<sub>2</sub>Br<sub>2</sub> as an internal standard.

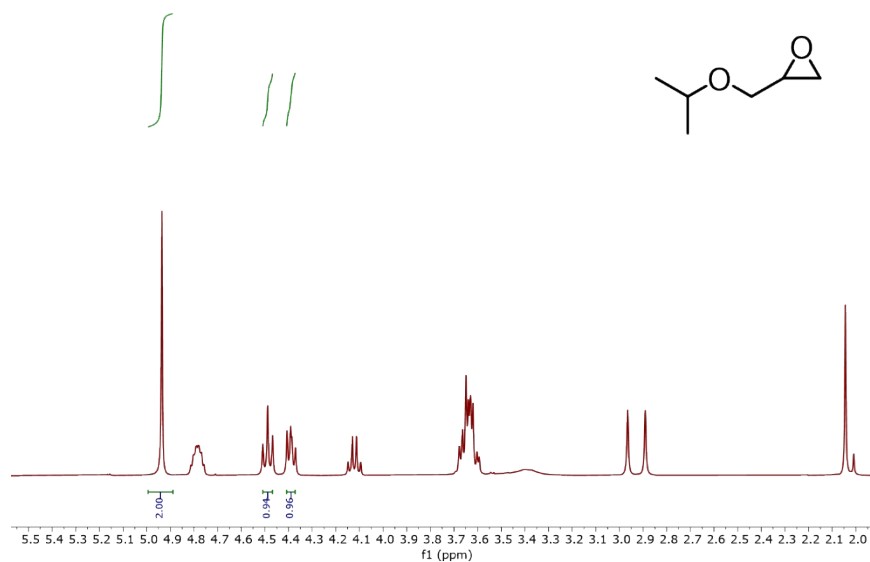

**Fig. S25** The yields of the cyclic carbonates were calculated by <sup>1</sup>H NMR of 2-(isopropoxy ethyl)oxirane using CH<sub>2</sub>Br<sub>2</sub> as an internal standard.

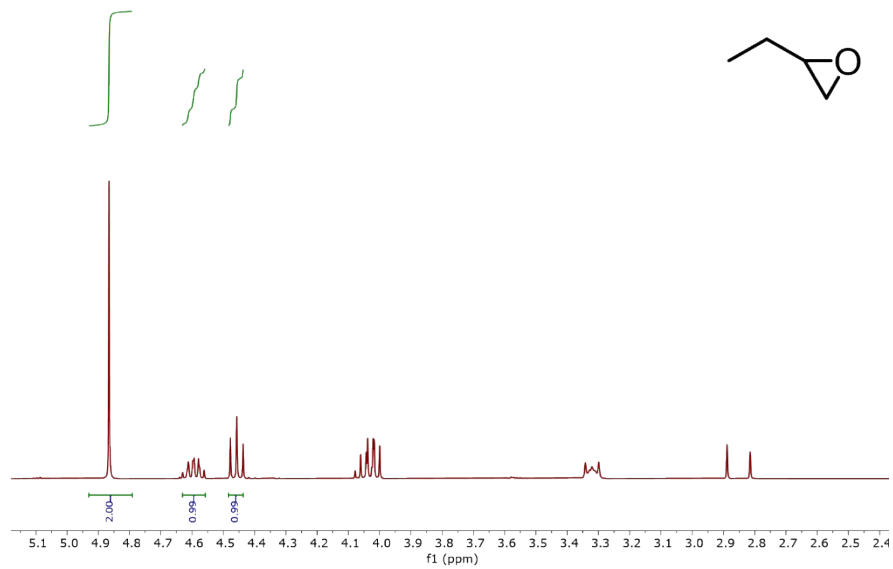

**Fig. S26** The yields of the cyclic carbonates were calculated by  $^1\text{H}$  NMR of 2-methyl oxirane using  $\text{CH}_2\text{Br}_2$  as an internal standard.

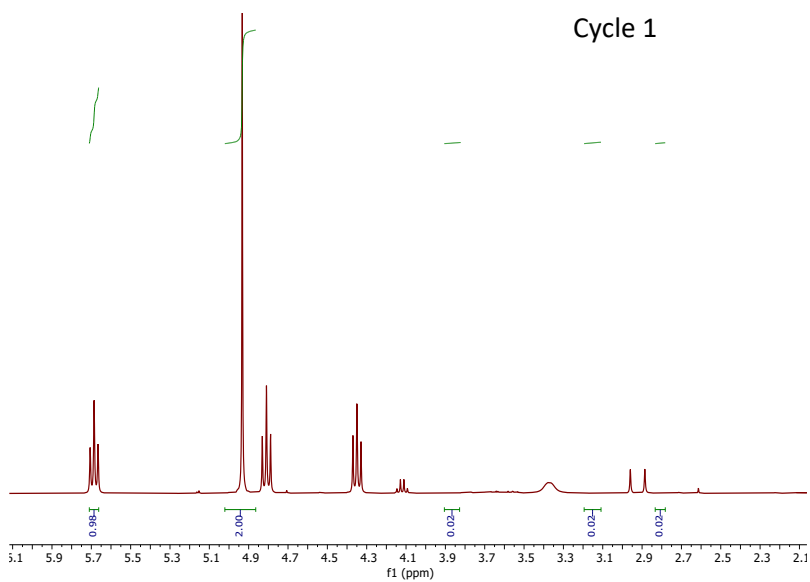

**Fig. S27** The cyclic carbonate yields of 1st cycle were calculated by  $^1\text{H}$  NMR using  $\text{CH}_2\text{Br}_2$  as an internal standard.

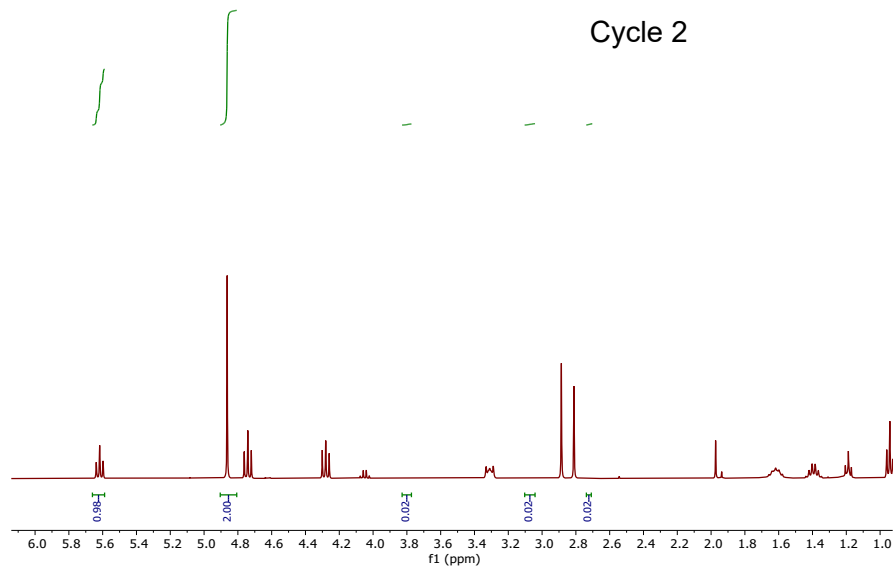

**Fig. S28** The cyclic carbonate yields of 2nd cycle were calculated by <sup>1</sup>H NMR using CH<sub>2</sub>Br<sub>2</sub> as an internal standard.

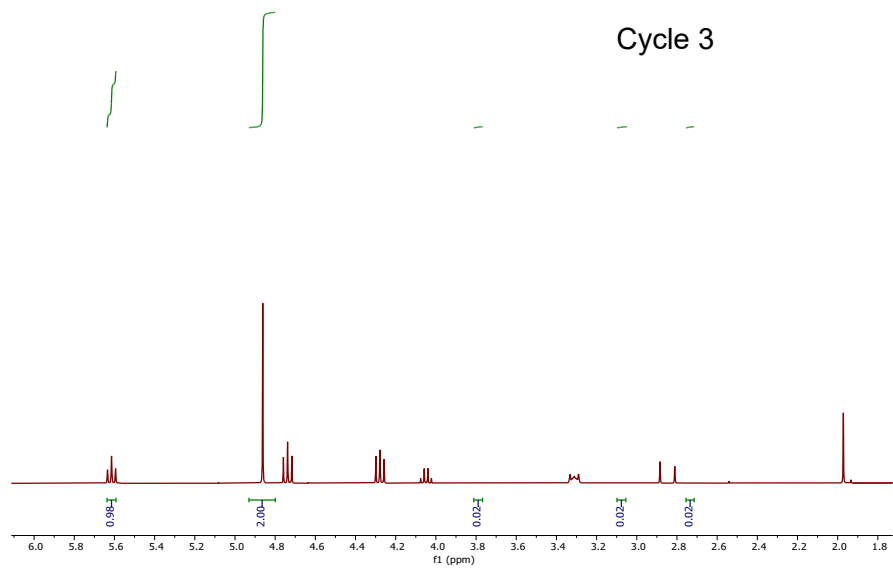

**Fig. S29** The cyclic carbonate yields of 3rd cycle were calculated by <sup>1</sup>H NMR using CH<sub>2</sub>Br<sub>2</sub> as an internal standard.



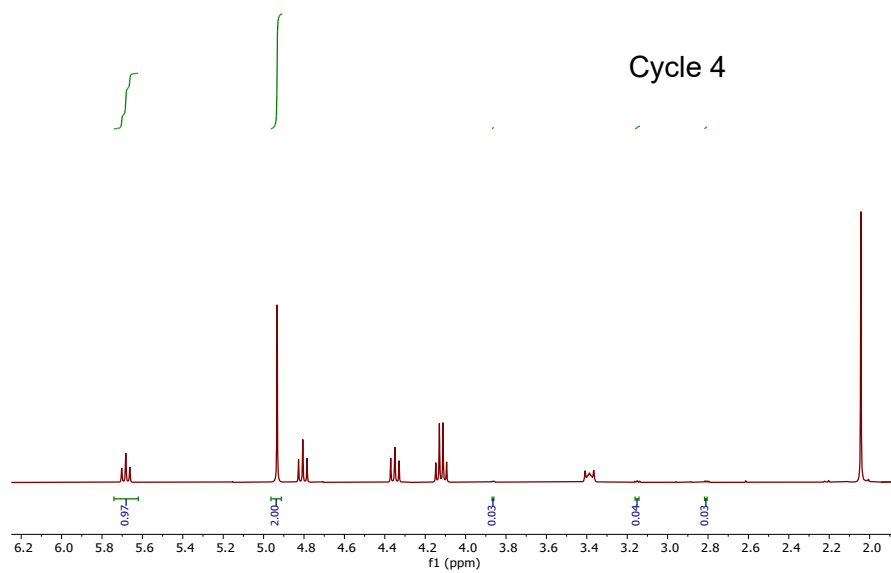

**Fig. S30** The cyclic carbonate yields of the 4th cycle were calculated by <sup>1</sup>H NMR using CH<sub>2</sub>Br<sub>2</sub> as an internal standard.

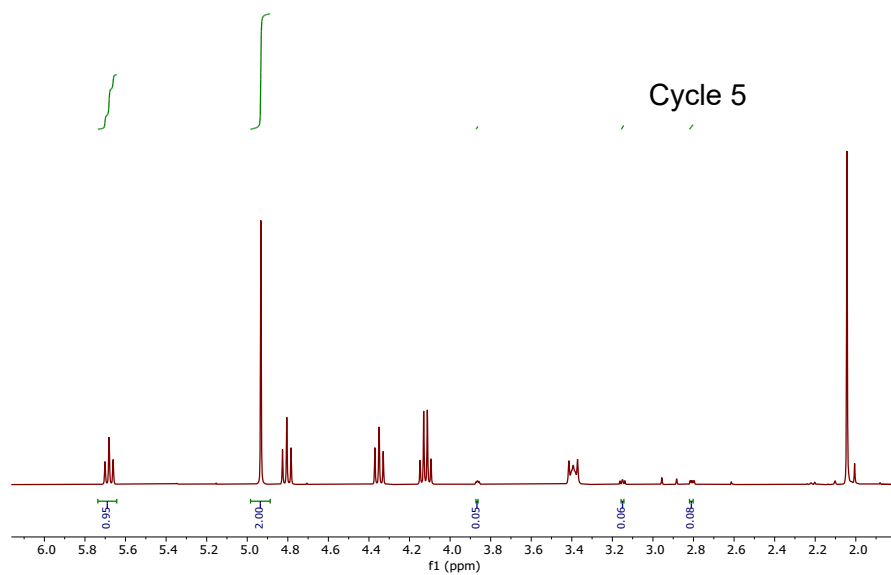

**Fig. S31** The cyclic carbonate yields of the 5th cycle were calculated by <sup>1</sup>H NMR using CH<sub>2</sub>Br<sub>2</sub> as an internal standard.

**Table S1.** The Crystallographic data for POM-COOH and M-POMOFs.

| Name                                 | POM-COOH                                                                                             | Zn-POMOF                                                                                                         | Co-POMOF                                                                                                            | Fe(III)-POMOF                                                                                                    |
|--------------------------------------|------------------------------------------------------------------------------------------------------|------------------------------------------------------------------------------------------------------------------|---------------------------------------------------------------------------------------------------------------------|------------------------------------------------------------------------------------------------------------------|
| CCDC                                 | 2381572                                                                                              | 2381573                                                                                                          | 2381574                                                                                                             | 2381575                                                                                                          |
| Empirical formula                    | C <sub>95</sub> H <sub>186</sub> MnMo <sub>6</sub> N <sub>6</sub> O <sub>31.5</sub> S <sub>3.5</sub> | C <sub>36</sub> H <sub>33</sub> Mn <sub>1.5</sub> Mo <sub>9</sub> N <sub>3</sub> O <sub>43</sub> Zn <sub>2</sub> | C <sub>145</sub> H <sub>129</sub> Co <sub>8</sub> Mn <sub>6</sub> Mo <sub>36</sub> N <sub>12</sub> O <sub>180</sub> | C <sub>36</sub> H <sub>33</sub> Fe <sub>2</sub> Mn <sub>1.5</sub> Mo <sub>9</sub> N <sub>3</sub> O <sub>43</sub> |
| Formula weight                       | 2659.28                                                                                              | 2272.26                                                                                                          | 9174.51                                                                                                             | 2253.22                                                                                                          |
| Temperature/K                        | 193.00                                                                                               | 193.00                                                                                                           | 153.00                                                                                                              | 173.00k                                                                                                          |
| Crystal system                       | triclinic                                                                                            | trigonal                                                                                                         | monoclinic                                                                                                          | trigonal                                                                                                         |
| Space group                          | P-1                                                                                                  | R-3m                                                                                                             | P2 <sub>1</sub> /n                                                                                                  | R-3m                                                                                                             |
| a/Å                                  | 16.5890(17)                                                                                          | 45.047(2)                                                                                                        | 18.5098(16)                                                                                                         | 45.266(18)                                                                                                       |
| b/Å                                  | 17.1075(18)                                                                                          | 45.047                                                                                                           | 44.611(3)                                                                                                           | 45.266(18)                                                                                                       |
| c/Å                                  | 22.616(2)                                                                                            | 18.7659(10)                                                                                                      | 26.993(2)                                                                                                           | 18.250(7)                                                                                                        |
| α/°                                  | 90.450(4)                                                                                            | 90                                                                                                               | 90                                                                                                                  | 90                                                                                                               |
| β/°                                  | 106.263(4)                                                                                           | 90                                                                                                               | 102.893(4)                                                                                                          | 90                                                                                                               |
| γ/°                                  | 95.652(4)                                                                                            | 120                                                                                                              | 90                                                                                                                  | 120                                                                                                              |
| Volume/Å <sup>3</sup>                | 6127.2(11)                                                                                           | 32979(4)                                                                                                         | 21727(3)                                                                                                            | 32385(28)                                                                                                        |
| Z                                    | 2                                                                                                    | 6                                                                                                                | 1                                                                                                                   | 6                                                                                                                |
| ρ <sub>calc</sub> /g/cm <sup>3</sup> | 1.441                                                                                                | 0.686                                                                                                            | 0.701                                                                                                               | 0.693                                                                                                            |
| μ/mm <sup>-1</sup>                   | 4.588                                                                                                | 0.821                                                                                                            | 4.248                                                                                                               | 0.749                                                                                                            |
| F(000)                               | 2766.0                                                                                               | 6537.0                                                                                                           | 4401.0                                                                                                              | 6489.0                                                                                                           |
| Crystal size/mm <sup>3</sup>         | 0.23 × 0.22 × 0.2                                                                                    | 0.23 × 0.14 × 0.1                                                                                                | 0.2 × 0.15 × 0.1                                                                                                    | 0.3 × 0.25 × 0.2                                                                                                 |
| Radiation                            | GaKα (λ = 1.34139)                                                                                   | MoKα (λ = 0.71073)                                                                                               | GaKα (λ = 1.34138)                                                                                                  | MoKα (λ = 0.71073)                                                                                               |
| 2θ range for data collection/°       | 3.544 to 105.964                                                                                     | 3.512 to 50.114                                                                                                  | 3.392 to 106.758                                                                                                    | 3.54 to 44.996                                                                                                   |
| Index ranges                         | -19 ≤ h ≤ 19, -20 ≤ k ≤ 20, -26 ≤ l ≤ 26                                                             | -53 ≤ h ≤ 53, -53 ≤ k ≤ 53, -22 ≤ l ≤ 22                                                                         | -22 ≤ h ≤ 21, -52 ≤ k ≤ 53, -25 ≤ l ≤ 32                                                                            | -46 ≤ h ≤ 48, -48 ≤ k ≤ 48, -19 ≤ l ≤ 19                                                                         |
| Reflections collected                | 62217                                                                                                | 84385                                                                                                            | 165304                                                                                                              | 57376                                                                                                            |
| Independent reflections              | 21332 [R <sub>int</sub> = 0.0488, R <sub>sigma</sub> = 0.0490]                                       | 6767 [R <sub>int</sub> = 0.0832, R <sub>sigma</sub> = 0.0413]                                                    | 38636 [R <sub>int</sub> = 0.0867, R <sub>sigma</sub> = 0.1005]                                                      | 4934 [R <sub>int</sub> = 0.1548, R <sub>sigma</sub> = 0.0823]                                                    |
| Goodness-of-fit on F <sup>2</sup>    | 1.071                                                                                                | 1.020                                                                                                            | 0.902                                                                                                               | 0.818                                                                                                            |
| Final R indexes [I ≥ 2σ (I)]         | R <sub>1</sub> = 0.0833, wR <sub>2</sub> = 0.2149                                                    | R <sub>1</sub> = 0.0894, wR <sub>2</sub> = 0.2815                                                                | R <sub>1</sub> = 0.0784, wR <sub>2</sub> = 0.2495                                                                   | R <sub>1</sub> = 0.0903, wR <sub>2</sub> = 0.2849                                                                |
| Final R indexes [all data]           | R <sub>1</sub> = 0.0883, wR <sub>2</sub> = 0.2173                                                    | R <sub>1</sub> = 0.1454, wR <sub>2</sub> = 0.3582                                                                | R <sub>1</sub> = 0.1491, wR <sub>2</sub> = 0.2988                                                                   | R <sub>1</sub> = 0.1849, wR <sub>2</sub> = 0.3151                                                                |

$$R_1 = \frac{\sum ||F_o| - |F_c||}{\sum |F_o|}, wR_2 = \frac{|\sum w(|F_o|^2 - |F_c|^2)|}{\sum w(F_o^2)^2}^{1/2}$$

## References

1. L. Zhang, S. Yuan, W. Fan, J. Pang, F. Li, B. Guo, P. Zhang, D. Sun and H.-C. Zhou, *ACS Appl. Mater. Interfaces*, 2019, **11**, 22390-22397.
2. H.-Q. Yin, M.-Y. Cui, H. Wang, Y.-Z. Peng, J. Chen, T.-B. Lu and Z.-M. Zhang, *Inorg. Chem.*, 2023, **62**, 13722-13730.
